# Supplementary material
Source: MDPI journal article supplement (https://www.mdpi.com/2075-163X/11/4/422)
Supplement: s1 [file s1]

# Supplementary Materials: Development of Mine Soils in a Chronosequence of Forestry-Reclaimed Sites in Eastern Kentucky

Kenton L. Sena \*, Kevin M. Yeager, Christopher D. Barton, John M. Lhotka, William E. Bond and Kimberly J. Schindler

**Table S1.** Linear regression model parameter estimates for soil chemical and physical characteristics by time since reclamation.

| Regression<br>Parameter or<br>Statistic | Al     | Mn     | Fe     | Mg     | K      | Ca     | Na     | $\delta^{13}\text{C}$ | OC     | Gravel | Sand   | Silt   | Clay   |
|-----------------------------------------|--------|--------|--------|--------|--------|--------|--------|-----------------------|--------|--------|--------|--------|--------|
| Parameters                              |        |        |        |        |        |        |        |                       |        |        |        |        |        |
| Intercept                               | 28,600 | 230    | 16,400 | 1630   | 10,600 | 795    | 2730   | −25.4                 | 0.439  | 52.3   | 23.8   | 20.5   | 3.43   |
| Time                                    | 1680   | 1.47   | 190    | 102    | 433    | 1.23   | −24.2  | −0.0284               | 0.0794 | −0.433 | −0.107 | 0.510  | 0.03   |
| P-values                                |        |        |        |        |        |        |        |                       |        |        |        |        |        |
| Intercept                               | <0.001 | <0.001 | <0.001 | <0.001 | <0.001 | <0.001 | <0.001 | <0.001                | 0.0783 | <0.001 | <0.001 | <0.001 | <0.001 |
| Time                                    | <0.001 | 0.459  | 0.125  | <0.001 | <0.001 | 0.908  | 0.229  | 0.0868                | 0.0002 | 0.157  | 0.613  | 0.0014 | 0.379  |
| Model Fit Statistics                    |        |        |        |        |        |        |        |                       |        |        |        |        |        |
| $R^2$                                   | 0.436  | 0.0074 | 0.0315 | 0.286  | 0.324  | 0.0002 | 0.0195 | 0.0391                | 0.172  | 0.0269 | 0.0035 | 0.129  | 0.0105 |
| CV†                                     | 26.6   | 44.4   | 36.9   | 38.4   | 26.5   | 72.1   | 44.3   | −3.52                 | 88.6   | 34.9   | 51.4   | 33.0   | 50.2   |
| Root MSE                                | 12,200 | 109    | 6750   | 1030   | 4000   | 582    | 1,1005 | 0.902                 | 1.12   | 16.7   | 11.6   | 8.50   | 1.88   |

†CV = Coefficient of variance; MSE = mean square error.
